# Supplementary material for: Nanocrystalline mesoporous palladium activated tin oxide thin films as room-temperature hydrogen gas sensors
Source: Royal Society of Chemistry journal article supplement (doi:10.1039/b700029d), 2007-01-01
Supplement: b700029d.pdf [file b700029d.pdf]

## Nanocrystalline mesoporous palladium activated tin oxide thin films as room-temperature hydrogen gas sensors<sup>†</sup>

Goutam De,<sup>\*a,b</sup> Ralf Köhn,<sup>b+</sup> George Xomeritakis<sup>b</sup> and C. Jeffrey Brinker<sup>\*b,c</sup>

Manuscript no. B700029D

### Electronic supplementary information (ESI)

#### Experimental:

All chemicals were used as received. Tin (IV) tert-butoxide ( $\text{Sn}(\text{O}i\text{Bu})_4$ ), palladium acetate ( $\text{Pd}(\text{CH}_3\text{COO})_2$ ) and solvents (*n*-propanol and *i*-butanol) were obtained from Aldrich, while the acetic acid was supplied by J.T. Baker. The surfactant Pluronic P123 was donated by BASF Corporation. Compressed gas mixtures of 0.5% vol.  $\text{H}_2$ -in- $\text{N}_2$ , 0.5% vol.  $\text{CO}$ -in- $\text{N}_2$ , forming gas (7% vol.  $\text{H}_2$ -in- $\text{N}_2$ ),  $\text{N}_2$ ,  $\text{CH}_4$  and compressed air were obtained from Matheson Tri-Gas.

#### *Preparation of sols*

2.43 mmol  $\text{Sn}(\text{O}i\text{Bu})_4$  was first dissolved in 12.3 mmol *n*-propanol. To this 0.0583 mmol surfactant dissolved in 16.4 mmol *n*-propanol was added with stirring. A mixture of 9.72 mmol acetic acid in 12.3 mmol *n*-propanol, followed by 14.2 mmol *i*-butanol was added to the above solution with stirring. The stirring was continued overnight (16 h). 0.211 mmol  $\text{Pd}(\text{CH}_3\text{COO})_2$  was dissolved in 22 mmol acetone and added to the above sol with stirring. The doped sol is then filtered through a 0.2  $\mu\text{m}$  GHP Acrodisc<sup>®</sup> membrane

(Gelman Laboratory) prior to use for coating depositions. For comparison, a PdO-SnO<sub>2</sub> film without surfactant was also prepared. The nominal oxide molar ratio SnO<sub>2</sub>:PdO = 92:8 was maintained in the sols. The total oxide (SnO<sub>2</sub> + PdO) equivalent content in the sols was about 5.8% wt. in all cases.

### *Preparation of films*

Homogeneous films were deposited on plasma cleaned silicon wafers, Corning 7059, and silica glass substrates by spin-coating under ambient conditions (room temperature 21±1°C, relative humidity 5-10%), employing a spinning rate of 1,800 rpm. The films were stored in plastic boxes overnight and then dried at 100°C in air. The resulting dried films were then calcined for 6 h at 400°C in air.

### *Characterization*

Refractive index and thickness measurements were made with a J.A. Wollam Co. M44 spectroscopic ellipsometer. All refractive index values (reported at a wavelength of 630.5 nm) and thickness measurements were made in triplicate and averaged. FTIR spectra were taken on a Bruker spectrometer (model Vector 22). XRD was recorded on a Siemens D-500 diffractometer, using a Cu K<sub>α</sub> source. TEM was performed on a JEOL 2010 microscope, equipped with an energy dispersive X-ray scattering measurement (EDX) facility. High resolution SEM (FE-SEM) images were obtained in a Hitachi field-emission scanning electron microscope. X-ray photoelectron spectra (XPS) were obtained in a Kratos Axis Ultra XPS using a monochromatic Al K<sub>α</sub> X-ray source.

*Gas Sensing Measurements*

For gas sensing measurements, the films were deposited on SAW substrates. The sensor film was sealed with copper O-ring inside a custom stainless steel holder, having appropriate electrical contacts with the two gold electrodes of the SAW device substrate, and equipped with inlets and outlets for gas flow. A mixture of air, 0.5% vol. H<sub>2</sub>-in-N<sub>2</sub>, 0.5% vol. CO-in-N<sub>2</sub>, forming gas (7% vol. H<sub>2</sub>-in-N<sub>2</sub>), CH<sub>4</sub> and N<sub>2</sub> was flown over the sensor at a fixed total flow rate of 100 SCCM and P<sub>tot</sub> = 1 atm, adjusted with the aid of 2 mass flow controllers (Brooks Instr.). The gas relative humidity (R.H.) was controlled by flowing part of the gas through a bubbler filled with DI water. The film's electrical response (resistance range of 30 MΩ and lower) to different gases was recorded with a Hewlett Packard 3478A digital multimeter connected with a computer for data acquisition using LabView software. All dynamic resistance measurements are therefore reported from 30 MΩ to lower values and the data points are collected in every 1 sec of interval. A Techtron<sup>®</sup> DT-20 multimeter was used to record film resistances manually above 30 MΩ.

Electronic Supplementary Information (XRD results)

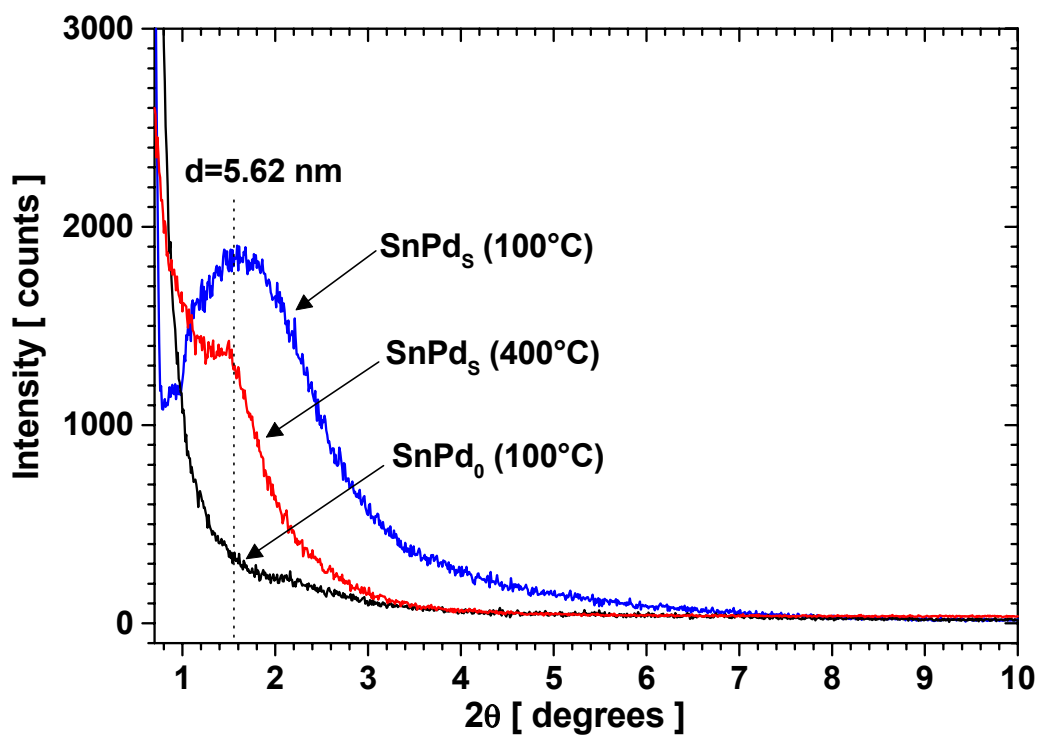

**Fig. S1.** Low angle XRD of SnPd<sub>s</sub> films deposited on Corning 7059 glass substrates. The low angle XRD of the corresponding SnPd<sub>0</sub> film prepared without surfactant is also shown.

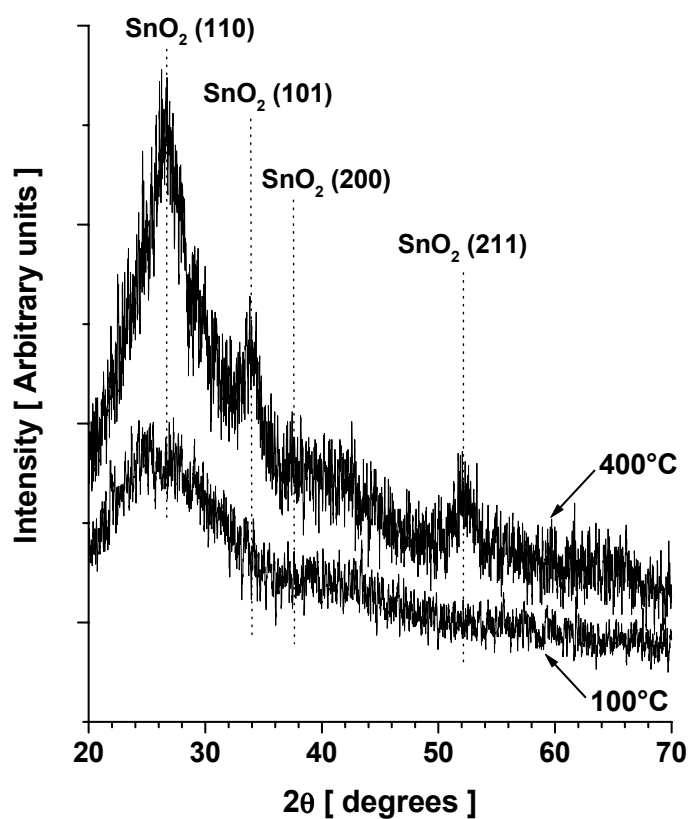

**Fig. S2.** The wide angle XRD of SnPd<sub>5</sub> films deposited on Corning 7059 glass substrates heated at 100 and 400 °C. The 400 °C film shows broad peaks corresponding to cassiterite SnO<sub>2</sub> structure. The SnO<sub>2</sub> (101) peak overlaps with broad amorphous peak arising from the glass substrate.
